# Supplementary material for: Predictive Glycaemic Response of Pasta Enriched with Juice, Puree, and Pomace from Red Cabbage and Spinach
Source: MDPI journal article supplement (doi:10.3390/nu14214575), 2022-10-31
Supplement: s1 [file s1]

**Table S1.** Key technical quality and anti-oxidant capacity of vegetable powder pasta and vegetable puree pasta

| Pasta Type            | Key Technical Quality    |                         |                         | Anti-oxidant Capacity |                                          |                                                  |
|-----------------------|--------------------------|-------------------------|-------------------------|-----------------------|------------------------------------------|--------------------------------------------------|
|                       | Cooking Loss<br>(g/100g) | Firmness g              | Breaking Distance<br>mm | Breaking<br>Force g   | Total Phenolic content<br>(mg GAE/100 g) | FRAPS ( $\mu\text{mol}$<br>$\text{Fe}^{2+}$ / g) |
| Spinach Pasta         |                          |                         |                         |                       |                                          |                                                  |
| Control               | $4.40 \pm 0.06^c$        | $399.75 \pm 11.51^c$    | $74.28 \pm 3.71^a$      | $33.55 \pm 1.19^d$    | $441.21 \pm 4.11^e$                      | $1.26 \pm 0.10^d$                                |
| Spinach puree 1%      | $4.45 \pm 0.09^c$        | $409.32 \pm 11.09^{bc}$ | $71.30 \pm 4.88^a$      | $41.18 \pm 2.23^b$    | $490.34 \pm 8.18^c$                      | $2.38 \pm 0.32^{bc}$                             |
| Spinach powder 1%     | $4.48 \pm 0.04^c$        | $401.54 \pm 9.76^c$     | $68.95 \pm 4.26^{ab}$   | $37.13 \pm 1.95^c$    | $473.67 \pm 5.95^d$                      | $2.28 \pm 0.30^c$                                |
| Spinach puree 2%      | $4.80 \pm 0.03^b$        | $427.46 \pm 10.49^a$    | $65.69 \pm 3.00^b$      | $42.34 \pm 2.87^{ab}$ | $521.60 \pm 2.73^a$                      | $3.27 \pm 0.43^a$                                |
| Spinach powder 2%     | $4.91 \pm 0.05^a$        | $419.67 \pm 11.25^{ab}$ | $65.21 \pm 2.69^b$      | $38.12 \pm 3.67^c$    | $510.66 \pm 7.96^b$                      | $2.84 \pm 0.26^{ab}$                             |
| Red Cabbage pasta     |                          |                         |                         |                       |                                          |                                                  |
| Control               | $4.40 \pm 0.06^c$        | $399.75 \pm 11.51^a$    | $74.28 \pm 3.71^a$      | $33.55 \pm 1.19^a$    | $441.21 \pm 4.11^e$                      | $1.26 \pm 0.10^e$                                |
| Red cabbage puree 1%  | $4.80 \pm 0.07^b$        | $388.59 \pm 11.96^{ab}$ | $60.90 \pm 3.93^b$      | $31.41 \pm 2.24^{ab}$ | $713.13 \pm 9.74^b$                      | $5.48 \pm 0.10^c$                                |
| Red cabbage powder 1% | $4.88 \pm 0.05^{ab}$     | $396.34 \pm 9.95^a$     | $59.65 \pm 4.21^b$      | $31.66 \pm 2.62^{ab}$ | $629.24 \pm 8.31^d$                      | $4.45 \pm 0.21^d$                                |
| Red cabbage puree 2%  | $4.94 \pm 0.07^a$        | $372.80 \pm 11.96^c$    | $57.45 \pm 3.78^b$      | $31.12 \pm 2.23^{ab}$ | $778.85 \pm 7.11^a$                      | $8.38 \pm 0.06^a$                                |
| Red cabbage powder 2% | $4.98 \pm 0.06^a$        | $382.66 \pm 8.94^{bc}$  | $57.51 \pm 4.04^b$      | $30.97 \pm 1.79^b$    | $679.64 \pm 10.15^c$                     | $6.95 \pm 0.12^b$                                |

Values within a column followed by the same letter are not significantly different from each other ( $p > 0.05$ ) at the same pasta group, according to the ANOVA-Duncan test.
