# Supplementary material for: Predictive Glycaemic Response of Pasta Enriched with Juice, Puree, and Pomace from Red Cabbage and Spinach
Source: MDPI journal article supplement (doi:10.3390/nu14214575), 2022-10-31
Supplement: s1 [file s1]

**Table S2. HPLC Gradient.**

| <b>Time<br/>(min)</b> | <b>A%</b> | <b>C%</b> |
|-----------------------|-----------|-----------|
| 0                     | 68        | 32        |
| 3                     | 68        | 32        |
| 7                     | 30        | 70        |
| 9                     | 30        | 70        |
| 10                    | 68        | 32        |
| 15                    | 68        | 32        |

Solvent A, Methanol 100%, Solvent C, Ethyl-acetate 100%
