# Supplementary material for: Predictive Glycaemic Response of Pasta Enriched with Juice, Puree, and Pomace from Red Cabbage and Spinach
Source: MDPI journal article supplement (doi:10.3390/nu14214575), 2022-10-31
Supplement: s1 [file s1]

**Table S3:** Pearson's correlation coefficient (*r*) of Area Under the curve (AUC) of digestive starch versus Fibre and Starch content of vegetable pasta

|                   | SDF g/100g | IDF g/100g | TDF g/100g | Starch  |
|-------------------|------------|------------|------------|---------|
| Spinach pasta     |            |            |            |         |
| AUC               | -0.763 *   | -0.751     | -0.756 *   | 0.806 * |
| Red cabbage pasta |            |            |            |         |
| AUC               | -0.758 *   | -0.739     | -0.744     | 0.829 * |

\*Correlation is significant at 0.05 level; SDF, soluble dietary fibre; IDF, insoluble dietary fibre, TDF; Total dietary fibre
